# Supplementary material
Source: ML conference proceedings conference paper supplement (https://www.ecva.net/papers/eccv_2020/papers_ECCV/html/123610358_ECCV_2020_paper.php)
Supplement: Supplementary file 1 [file 123610358-supp.zip]

# Polarized Optical-Flow Gyroscope: Supplementary Material

Masada Tzabari and Yoav Y. Schechner

Viterbi Faculty of Electrical Engineering  
Technion - Israel Institute of Technology Haifa 32000, Israel  
`masada.tz@campus.technion.ac.il ; yoav@ee.technion.ac.il`  
<http://www.ee.technion.ac.il/~yoav>

**Abstract.** This is a supplementary document to the main manuscript. Here we provide a demonstration of angular-velocity estimation from a polarized single-pixel sensor. We also display the polarization and intensity properties of the simulated and experimental scenes.

## 1 Single-Pixel Sensor

Consider a camera with a wide field of view, but no spatial resolution (a single pixel). A constant rotation rate may be estimated by fitting the change in the single-pixel intensity. Recall Eq. (2) of the main manuscript:

$$I(\mathbf{x}_{\text{cam}}) = I(\mathcal{T}\mathbf{x}_{\text{obj}}) = \frac{c(\mathbf{x}_{\text{obj}})}{2} \{1 + p(\mathbf{x}_{\text{obj}}) \cos 2[\alpha - \theta(\mathbf{x}_{\text{obj}})]\}. \quad (1)$$

Prior to rotation, the polarizer axis is  $\alpha_0$ . Then  $\alpha = \alpha_0 + \omega t$ . Eq. (1) above becomes

$$I_{\text{cam}} = \frac{c_{\text{obj}}}{2} \left\{ 1 + p_{\text{obj}} \cos 2 \left[ \omega t - \tilde{\theta}_{\text{obj}} \right] \right\}, \quad (2)$$

where  $\tilde{\theta}_{\text{obj}} = \theta_{\text{obj}} - \alpha_0$ . This problem has four unknowns:  $c_{\text{obj}}$ ,  $p_{\text{obj}}$ ,  $\tilde{\theta}_{\text{obj}}$ , and the angular velocity  $\omega$ . Therefore, under constant rate of rotation, a solution requires four measurements at different known time instances.

We demonstrate this principle using the experimental images. In lieu of a single wide field pixel, we used the spatial mean intensity of an image. The spatial mean intensity in a sequence of images can be fitted by Least Square (LS) to Eq. (2) above.

$$\{\hat{c}_{\text{obj}}, \hat{p}_{\text{obj}}, \hat{\theta}_{\text{obj}}, \hat{\omega}\} = \underset{c_{\text{obj}}, p_{\text{obj}}, \tilde{\theta}_{\text{obj}}, \omega}{\operatorname{argmin}} \sum_{t=1}^K \left| I_{\text{cam}}(t) - \frac{c_{\text{obj}}}{2} \left\{ 1 + p_{\text{obj}} \cos 2 \left[ \omega t - \tilde{\theta}_{\text{obj}} \right] \right\} \right|^2, \quad (3)$$

where  $K \geq 4$  is the number of frames. In our case, fitting was done via the MatLab *cftool* curve fitting tool. The true and estimated values of  $\omega$  are presented in Table 1. Scenes with strong, homogeneous polarization, e.g. *LCD screen* and *Sky*, had more successful estimations.

**Table 1.** The true values of  $\omega$ , and values estimated from LS fitting to Eq. (2)

| Scene                          | <i>LCD screen</i> | <i>Kitchen</i> | <i>Sky</i> | <i>Elevator</i> |
|--------------------------------|-------------------|----------------|------------|-----------------|
| True $\omega$ [deg/frame]      | 10                | 6              | 10         | 6               |
| estimated $\omega$ [deg/frame] | 10.18             | 8.5            | 7.8        | 8.6             |

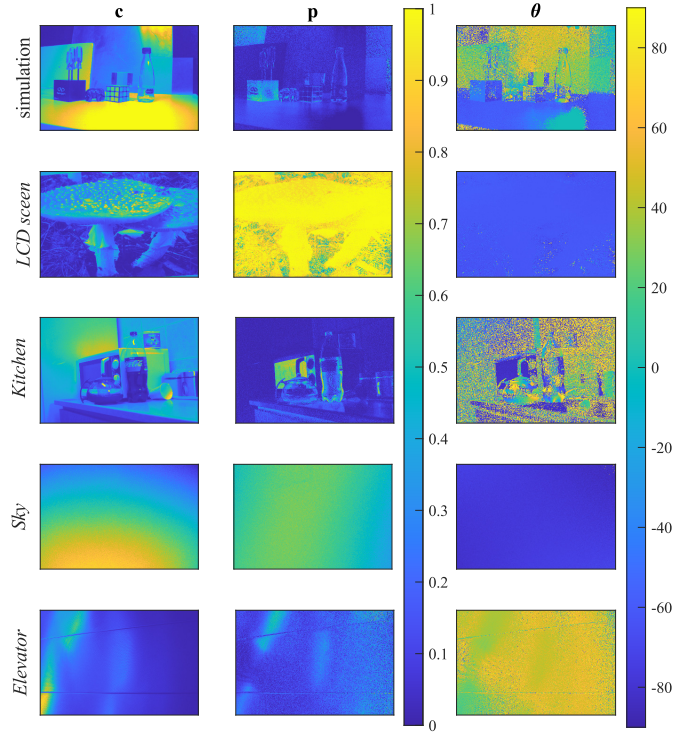**Fig. 1.** Polarization and intensity properties of simulated and experimental scenes.

## 2 Polarization Properties

Fig. 1 presents the ground-truth intensity  $c$ , degree of polarization  $p$ , and angle of polarization  $\theta$ , of all simulated and experimental scenes.
