# Supplementary material
Source: ML conference proceedings conference paper supplement (https://www.ecva.net/papers/eccv_2020/papers_ECCV/html/123610358_ECCV_2020_paper.php)
Supplement: Supplementary file 3 [file 123610358-supp.zip]

Archive with 16 entries (16 files):
- llncs.cls
- README.txt
- ruler.sty
- splncs.bst
- splncs04.bst
- comment.sty
- cvpr_eso.sty
- 2559_supp.tex
- eso-pic.sty
- history.txt
- .DS_Store
- llncsdoc.pdf
- one_pixel.eps
- all_cpt.pdf
- all_cpt.eps
- 2559_supp.pdf
