# Supplementary material
Source: ML conference proceedings conference paper supplement (https://www.ecva.net/papers/eccv_2020/papers_ECCV/html/123610358_ECCV_2020_paper.php)
Supplement: Supplementary file 3 [file 123610358-supp.zip › 2559_supp.tex]

% updated April 2002 by Antje Endemann
% Based on CVPR 07 and LNCS, with modifications by DAF, AZ and elle, 2008 and AA, 2010, and CC, 2011; TT, 2014; AAS, 2016; AAS, 2020

\documentclass[runningheads]{llncs}
\usepackage{graphicx}
\usepackage{comment}
\usepackage{color}
\usepackage[nocompress]{cite}
%\usepackage{url}
\usepackage{amsmath,amssymb}
\usepackage[switch]{lineno}
\usepackage{float}
\usepackage{nomencl}
\usepackage{breqn}
\usepackage{gensymb}
\usepackage{xcolor}
\usepackage{soul}
\graphicspath{ {./images/} }
\usepackage{graphicx}
\usepackage{acronym}

%\usepackage{tikz}

% INITIAL SUBMISSION - The following two lines are NOT commented
% CAMERA READY - Comment OUT the following two lines
%\usepackage{ruler}
%\usepackage[width=122mm,left=12mm,paperwidth=146mm,height=193mm,top=12mm,paperheight=217mm]{geometry}

\newacro{AOP}{angle of polarization}


\begin{document}
% \renewcommand\thelinenumber{\color[rgb]{0.2,0.5,0.8}\normalfont\sffamily\scriptsize\arabic{linenumber}\color[rgb]{0,0,0}}
% \renewcommand\makeLineNumber {\hss\thelinenumber\ \hspace{6mm} \rlap{\hskip\textwidth\ \hspace{6.5mm}\thelinenumber}}
% \linenumbers
\pagestyle{headings}
\mainmatter
\def\ECCVSubNumber{2559}  % Insert your submission number here

\title{Polarized Optical-Flow Gyroscope:\\
Supplementary Material} % Replace with your title

% INITIAL SUBMISSION 
\begin{comment}
\titlerunning{ECCV-20 submission ID \ECCVSubNumber} 
\authorrunning{ECCV-20 submission ID \ECCVSubNumber} 
\author{Anonymous ECCV submission}
\institute{Paper ID \ECCVSubNumber}
\end{comment}
%******************

% CAMERA READY SUBMISSION
%\begin{comment}
\titlerunning{Polarized Optical-Flow Gyroscope}
% If the paper title is too long for the running head, you can set
% an abbreviated paper title here
%
\author{Masada Tzabari \and
Yoav Y. Schechner}
%
\authorrunning{M. Tzabari and Y. Schechner}
% First names are abbreviated in the running head.
% If there are more than two authors, 'et al.' is used.
%
\institute{Viterbi Faculty of Electrical Engineering\\
Technion - Israel Institute of Technology Haifa 32000, Israel\\
\email{masada.tz@campus.technion.ac.il}\;;
\email{yoav@ee.technion.ac.il}\\
\url{http://www.ee.technion.ac.il/$\sim$yoav}}
%\end{comment}
%******************
\maketitle

\begin{abstract}
This is a supplementary document to the main manuscript. Here we provide a demonstration of angular-velocity estimation from a polarized single-pixel sensor. We also display the polarization and intensity properties of the simulated and experimental scenes. 
\end{abstract}

\section{Single-Pixel Sensor}
Consider a camera with a wide field of view, but no spatial resolution (a single pixel). A constant rotation rate may be estimated by fitting the change in the single-pixel intensity.
Recall Eq. (2) of the main manuscript: 
 \begin{equation}
  I(\boldsymbol{x}_{\text{cam}})= 
   I({\cal T} \boldsymbol{x}_{\text{obj}})= 
  \frac{c(\boldsymbol{x}_{\text{obj}})}{2}
  \left\{
     1+p(\boldsymbol{x}_{\text{obj}})
     \cos2
     \left[
        \alpha-\theta(\boldsymbol{x}_{\text{obj}})
     \right]
    \right\}.
\label{eq:main_intensity}    
\end{equation}
Prior to rotation, the polarizer axis is $\alpha_0$. Then $\alpha = \alpha_0+\omega{t}$. Eq. (\ref{eq:main_intensity}) above becomes 
  \begin{equation}
  I_{\text{cam}}= 
  \frac{c_{\text{obj}}}{2}
  \left\{
     1+p_{\text{obj}}
     \cos2
     \left[
        \omega{t}-\tilde{\theta}_{\text{obj}}
     \right]
    \right\},
\label{eq:main_int_spe}    
\end{equation}
where $\tilde{\theta}_{\text{obj}}={\theta}_{\text{obj}}-\alpha_0$.
This problem has four unknowns: $c_{\text{obj}}$,  $p_{\text{obj}}$, $\tilde{\theta}_{\text{obj}}$, and the angular velocity $\omega$. Therefore, under constant rate of rotation, a solution requires four measurements at different known time instances.

 We demonstrate this principle using the experimental images. In lieu of a single wide field pixel, we used the spatial mean intensity of an image. The spatial mean intensity in a sequence of of images can be fitted by Least Square (LS) to Eq. (\ref{eq:main_int_spe}) above.
 \begin{equation}
 \begin{split}
     \{\hat{c}_{\text{obj}},\hat{p}_{\text{obj}},\hat{\theta}_{\text{obj}},\hat{\omega}\}=&\\ \underset{{c}_{\text{obj}},{p}_{\text{obj}},\tilde{\theta}_{\text{obj}},\omega}{\text{argmin}}
   &\sum_{t=1}^{K}\left|I_{\text{cam}}(t)- 
  \frac{c_{\text{obj}}}{2}
  \left\{
     1+p_{\text{obj}}
     \cos2
     \left[
        \omega{t}-\tilde{\theta}_{\text{obj}}
     \right]
    \right\}\right|^2,
\end{split}
 \end{equation}
 where $K\geq{4}$ is the number of frames. In our case, fitting was done via the MatLab \textit{cftool} curve fitting tool. The true and estimated values of $\omega$ are presented in Table \ref{table:one}. Scenes with strong, homogeneous polarization, e.g. \textit{LCD screen} and \textit{Sky}, had more successful estimations.    

\begin{table}[t]
\centering
\caption{The true values of $\omega$, and values estimated from LS fitting to Eq. (\ref{eq:main_int_spe})}
\begin{tabular}{ |c|c|c|c|c| } 
\hline
 Scene & \textit{LCD screen}  & \textit{Kitchen} & \textit{Sky} & \textit{Elevator} \\
 \hline  
 True $\omega$ [deg/frame]& 10 & 6 & 10 & 6 \\ 
 estimated $\omega$ [deg/frame] & 10.18 & 8.5 & 7.8 & 8.6 \\ 
 \hline
\end{tabular}
  \label{table:one}
\end{table}

\section{Polarization Properties}

\begin{figure}[t]
 \centering
  \includegraphics[height=10cm] {all_cpt.eps}\\
  \caption{Polarization and intensity properties of simulated and experimental scenes.}
  \label{fig:all_cpt}
\end{figure}
 
 Fig. \ref{fig:all_cpt} presents the ground-truth intensity $c$, degree of polarization $p$, and angle of polarization $\theta$, of all simulated and experimental scenes. 


% ---- Bibliography ----
%
% BibTeX users should specify bibliography style 'splncs04'.
% References will then be sorted and formatted in the correct style.
%
\end{document}
