# Supplementary material
Source: ML conference proceedings conference paper supplement (https://www.ecva.net/papers/eccv_2020/papers_ECCV/html/123610358_ECCV_2020_paper.php)

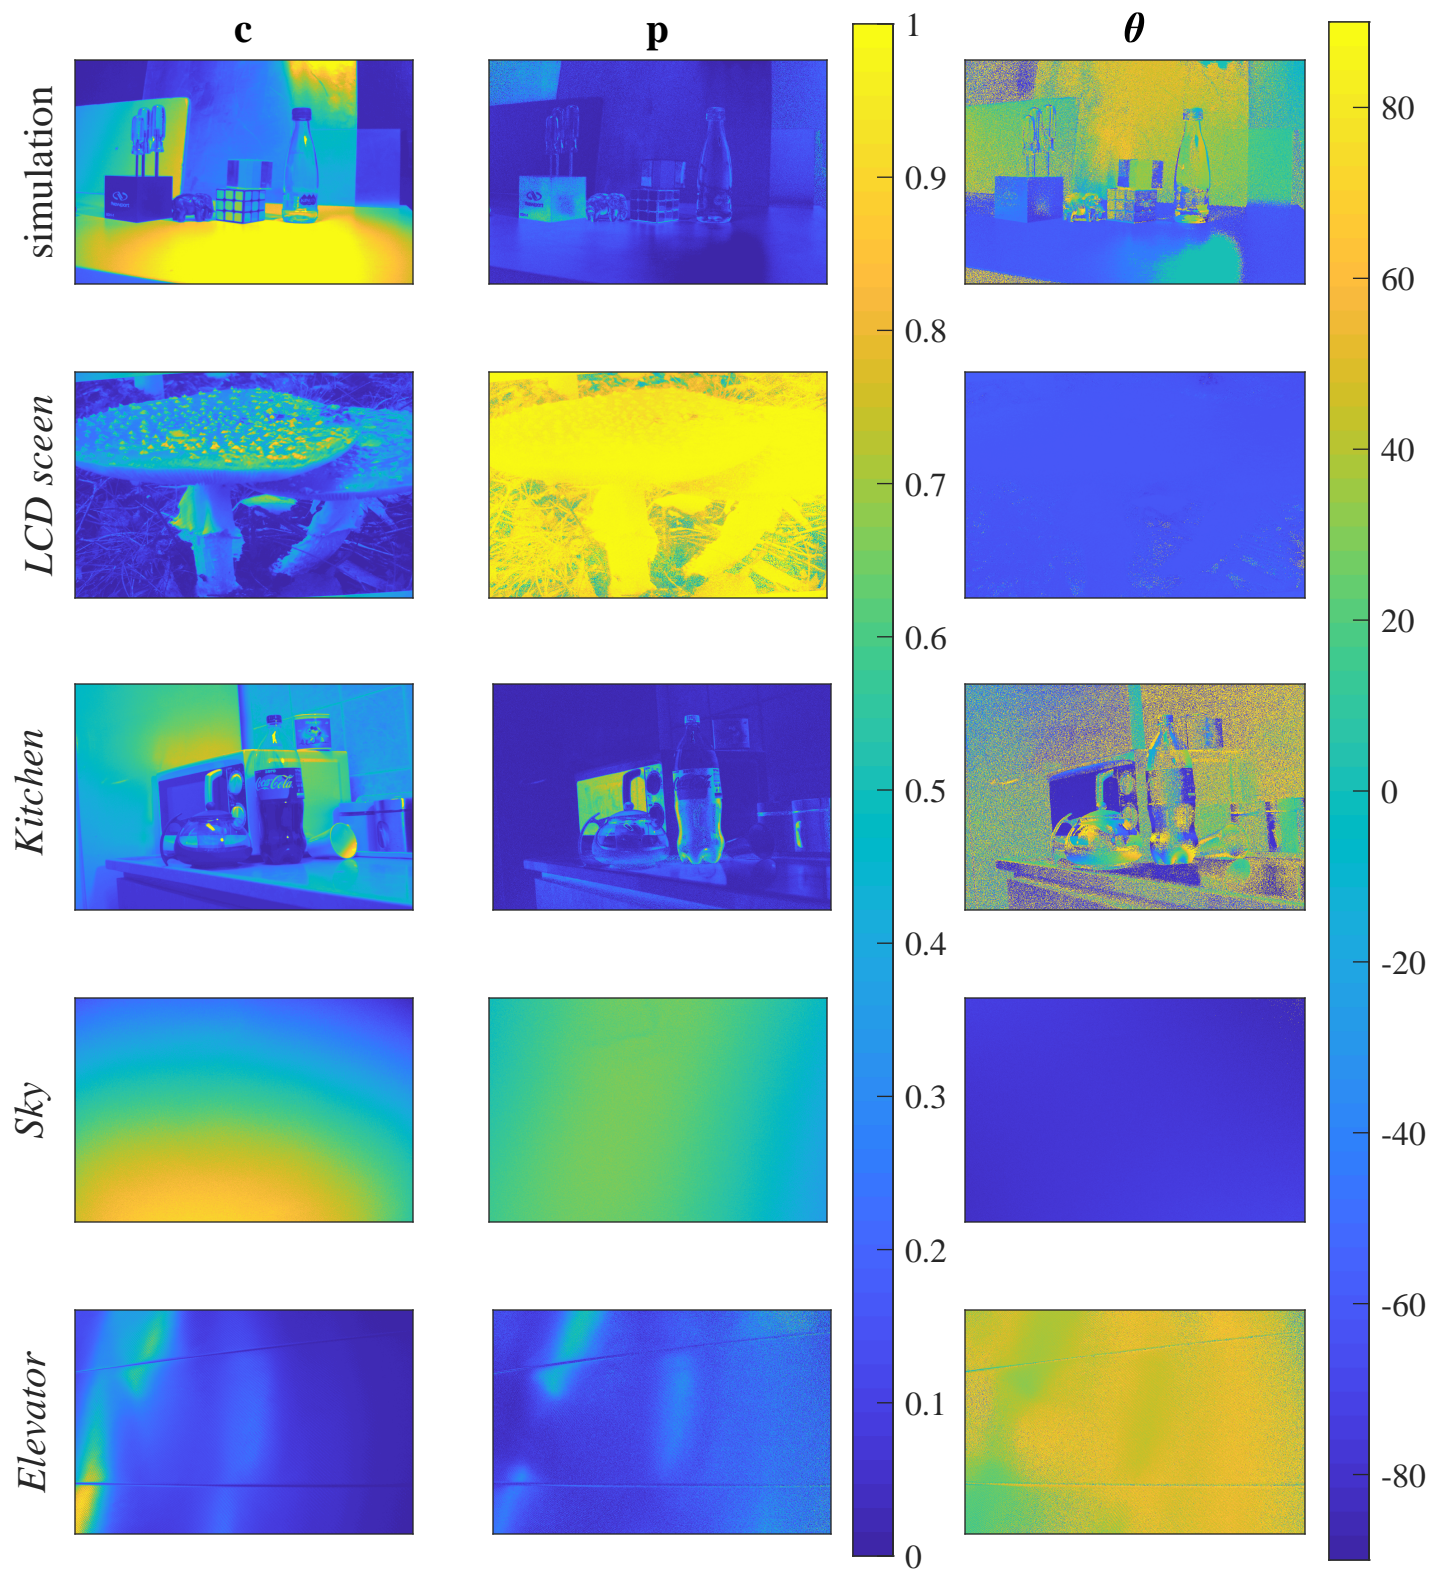

Supplement: Supplementary file 2 [file 123610358-supp.zip]
